# Supplementary material
Source: PubMed Central journal article supplement (PMC6645746)
Supplement: ao7b01918_si_001.pdf [file ao7b01918_si_001.pdf]

# Supporting Information

## pH-Responsive Charge-Conversional and Hemolytic Activities of Magnetic Nanocomposite Particles for Cell-Targeted Hyperthermia

Md. Abdur Rahman,<sup>1</sup> Yoshimasa Matsumura,<sup>1</sup> Shigekazu Yano,<sup>2</sup> Bungo Ochiai<sup>1\*</sup>

<sup>1</sup>Department of Chemistry and Chemical Engineering, Graduate School of Science and Engineering, Yamagata University, 4-3-16, Jonan, Yonezawa, Yamagata 992-8510, Japan

<sup>2</sup>Department of Biochemical Engineering, Graduate School of Science and Engineering, Yamagata University, 4-3-16, Jonan, Yonezawa, Yamagata 992-8510, Japan

| <b>Contents</b>                                                                                                               | <b>Pages</b> |
|-------------------------------------------------------------------------------------------------------------------------------|--------------|
| Characterization of NICS                                                                                                      | S2           |
| <sup>1</sup> H NMR spectrum of NICS-EA                                                                                        | S3           |
| EDX spectra                                                                                                                   | S3           |
| XRD analysis                                                                                                                  | S4           |
| Unit cell characterization of the charge-conversional<br>Fe <sub>3</sub> O <sub>4</sub> -NICS-EGDE-EA nanocomposite particles | S5           |
| TGA analysis                                                                                                                  | S6           |
| Time-dependent hemolysis                                                                                                      | S7           |
| Hemolytic activities of Fe <sub>3</sub> O <sub>4</sub> -NICS-EGDE nanocomposite particles                                     | S8           |
| Light microscopic observation of the hemolysis                                                                                | S9           |
| Membranolysis of sheep RBCc at pH 6.8, and pH 6.5                                                                             | S10          |
| References                                                                                                                    | S11          |

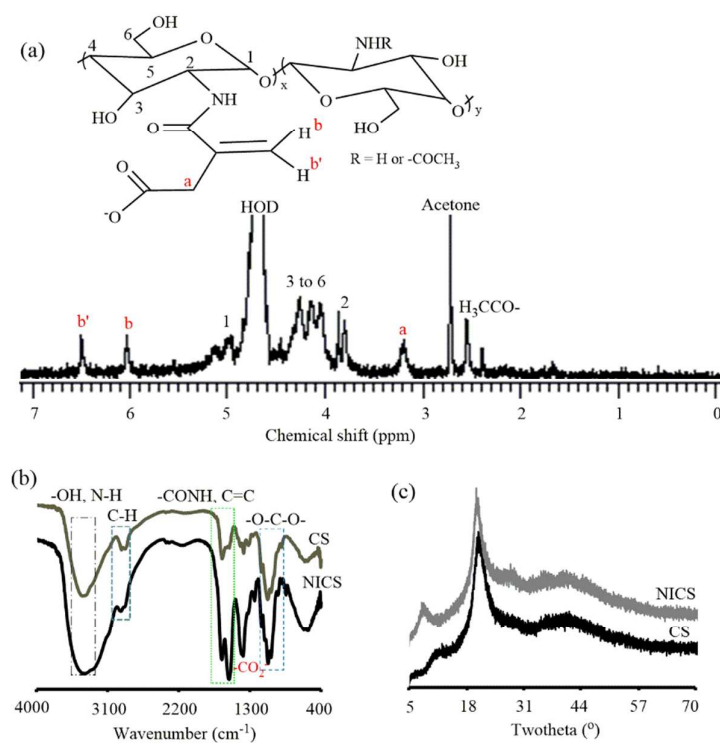

**Figure S1.** Characterization of NICS by (a)  $^1\text{H}$  NMR spectrum ( $\text{D}_2\text{O}$ ,  $90\text{ }^\circ\text{C}$ ,  $400\text{ MHz}$ ), (b) FTIR spectra of NICS and CS (KBr disk), and (c) XRD patterns of NICS and CS.

**$^1\text{H}$  NMR** (Figure S1<sub>a</sub>): The itaconization degree of CS was calculated to be 36% by using reported method.<sup>1</sup> The spectrum of CS was not measurable under this condition because of insolubility in water due to the strong intermolecular hydrogen bonding originates from high deacetylation degree.

**FTIR** (Figure S1<sub>b</sub>): A characteristic new peak appeared in the FTIR spectrum of NICS at  $1382\text{ cm}^{-1}$  assignable to the carbonyl stretching of  $-\text{CO}_2^-$  ions originating from itaconization of CS via neutralization with NaOH aq. In addition, the O-H, N-H, and -CONH- peaks were significantly changed from the CS spectrum.

**XRD** (Figure S1<sub>c</sub>): The XRD spectrum of CS shows a very weak reflection at  $11^\circ$  and a strong reflection at  $21^\circ$ , which are assignable to the crystal forms I and II of CS, respectively.<sup>2</sup> Therefore, CS has semicrystalline structure. However, the XRD pattern of NICS showed a medium intense diffraction band at  $8.5^\circ$ , and a strong reflection centred at  $20^\circ$  and no any significant peak observable at  $11^\circ$ . The absence of a signal at  $11^\circ$  and the change in peak position suggested that the crystal structure of CS was interrupted because of the insertion of hydrophilic *N*-itaconyl moieties. This outcome demonstrated that intermolecular hydrogen bonding was significantly lowered in NICS than that in CS resulting better dispersibility in water.

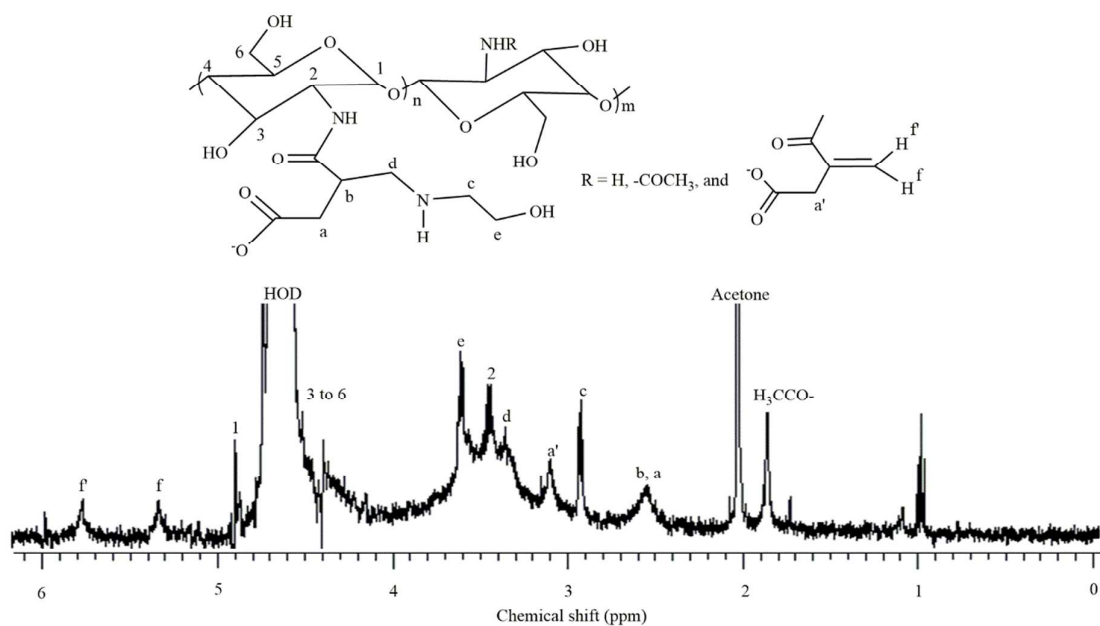

**Figure S2.**  $^1\text{H}$  NMR spectrum of NICS-EA ( $\text{D}_2\text{O}$ , 25 °C, 400 MHz).

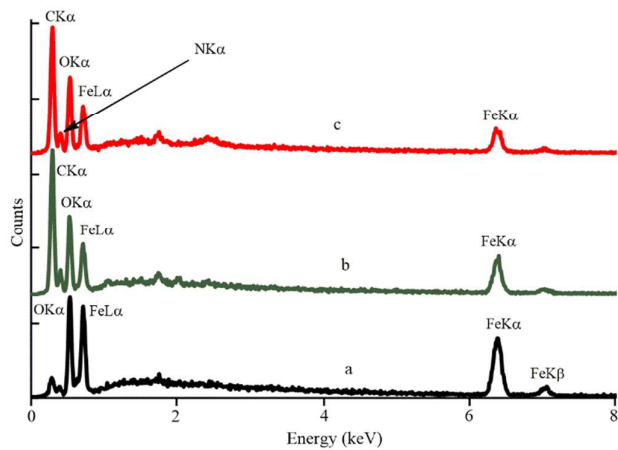

**Figure S3.** EDX spectra of (a) bare  $\text{Fe}_3\text{O}_4$ , (b)  $\text{Fe}_3\text{O}_4$ -NICS-EGDE, and (c) charge-conversional  $\text{Fe}_3\text{O}_4$ -NICS-EGDE-EA nanocomposite particles.

Samples were placed on a carbon tape for EDX analysis. As a result, the intensities of C and O signals are not quantitative. The peaks of C, O, Fe, and N are clearly visible in the spectra.

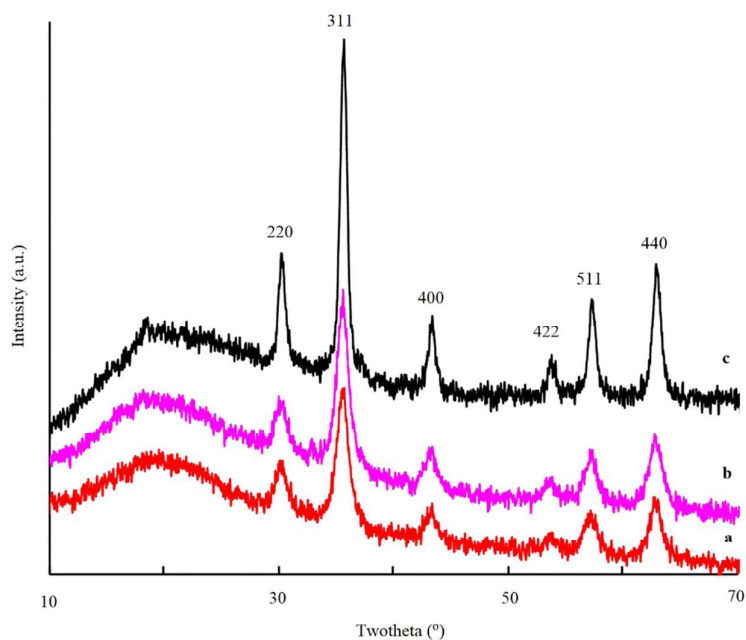

**Figure S4.** XRD analysis of (a) bare  $\text{Fe}_3\text{O}_4$ , (b)  $\text{Fe}_3\text{O}_4$ -NICS-EGDE, and (c) charge-conversional  $\text{Fe}_3\text{O}_4$ -NICS-EGDE-EA nanocomposite particles.

All of the XRD pattern shows six characteristic reflections assignable to the (220), (311), (400), (422), (511), and (440) lattice planes of spinel  $\text{Fe}_3\text{O}_4$  (JCPDS no. 88-0315)<sup>3</sup> and any significant peaks originating from other iron compounds were not observable.<sup>4</sup>

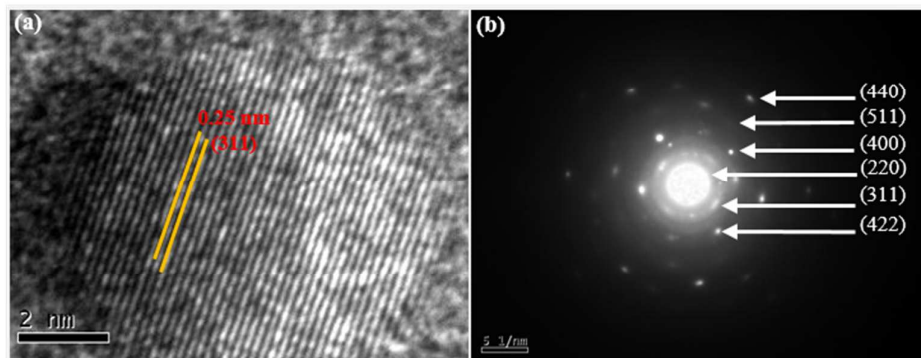

**Figure S5.** Unit cell characterization of charge-conversional  $\text{Fe}_3\text{O}_4$ -NICS-EGDE-EA nanocomposite particles by (a) HRTEM micrograph, and (b) SAED patterns.

The HRTEM micrograph (Figure S5<sub>a</sub>) of a single charge-conversional  $\text{Fe}_3\text{O}_4$ -NICS-EGDE-EA nanocomposite particle indicating the vivid lattice fringes with interplanar spacing of 0.25 nm assignable to the (311) plane. A typical SAED pattern shows clear spots, assignable to the six Miller indices ( $hkl$ ) calculated from d-spacing revealed the monocrystalline nature of the core  $\text{Fe}_3\text{O}_4$  that agrees with the XRD data (Figure S5<sub>b</sub>).

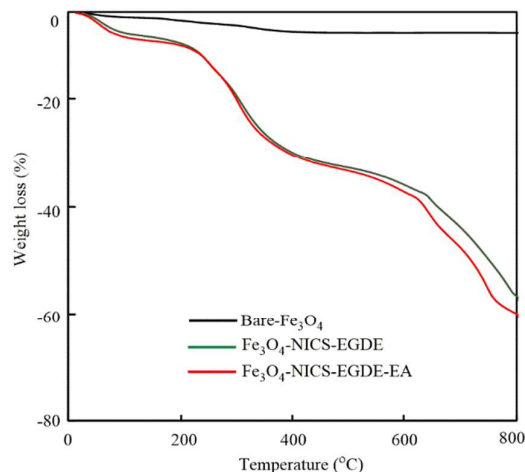

**Figure S6.** TGA profiles of (a) bare Fe<sub>3</sub>O<sub>4</sub>, (b) Fe<sub>3</sub>O<sub>4</sub>-NICS-EGDE, and (c) charge-conversional Fe<sub>3</sub>O<sub>4</sub>-NICS-EGDE-EA nanocomposite particles (10 °C min<sup>-1</sup>, N<sub>2</sub>).

The amounts of polymer-coating materials present in Fe<sub>3</sub>O<sub>4</sub>-NICS-EGDE and charge-conversional Fe<sub>3</sub>O<sub>4</sub>-NICS-EGDE-EA nanocomposite particles were estimated using TGA (Figure S6). Synthesized bare Fe<sub>3</sub>O<sub>4</sub> is highly thermo-stable, and the total weight loss was 4% below 450 °C, because of the desorption of physically and chemically bound water. Significant weight loss was invisible in the range of 450 to 800 °C. The TGA profiles of both composites revealed a significant three-stage weight loss with respect to their initial weights. The first 7% weight loss below 200 °C, is assignable to the removal of adsorbed water. The second-stage weight loss of 34 and 35% in the range of 200 to 600 °C are corresponded to the degradation of the coating materials. The final 55% and 59% weight loss are attributed to the coating-materials-induced catalytic degradation of core Fe<sub>3</sub>O<sub>4</sub> to  $\gamma$ -Fe<sub>2</sub>O<sub>3</sub> and FeO.<sup>5</sup>

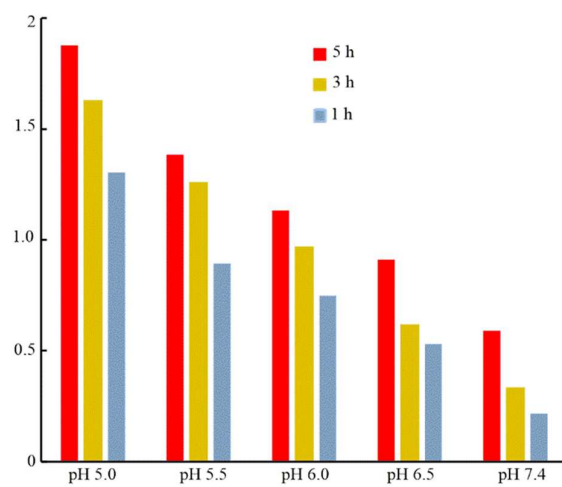

**Figure S7.** Time-dependent hemolysis of sheep RBCs by charge-conversional Fe<sub>3</sub>O<sub>4</sub>-NICS-EGDE-EA nanocomposite particles (600 μg ml<sup>-1</sup>, 0.150 M NaCl<sub>(aq)</sub>, 37 °C).

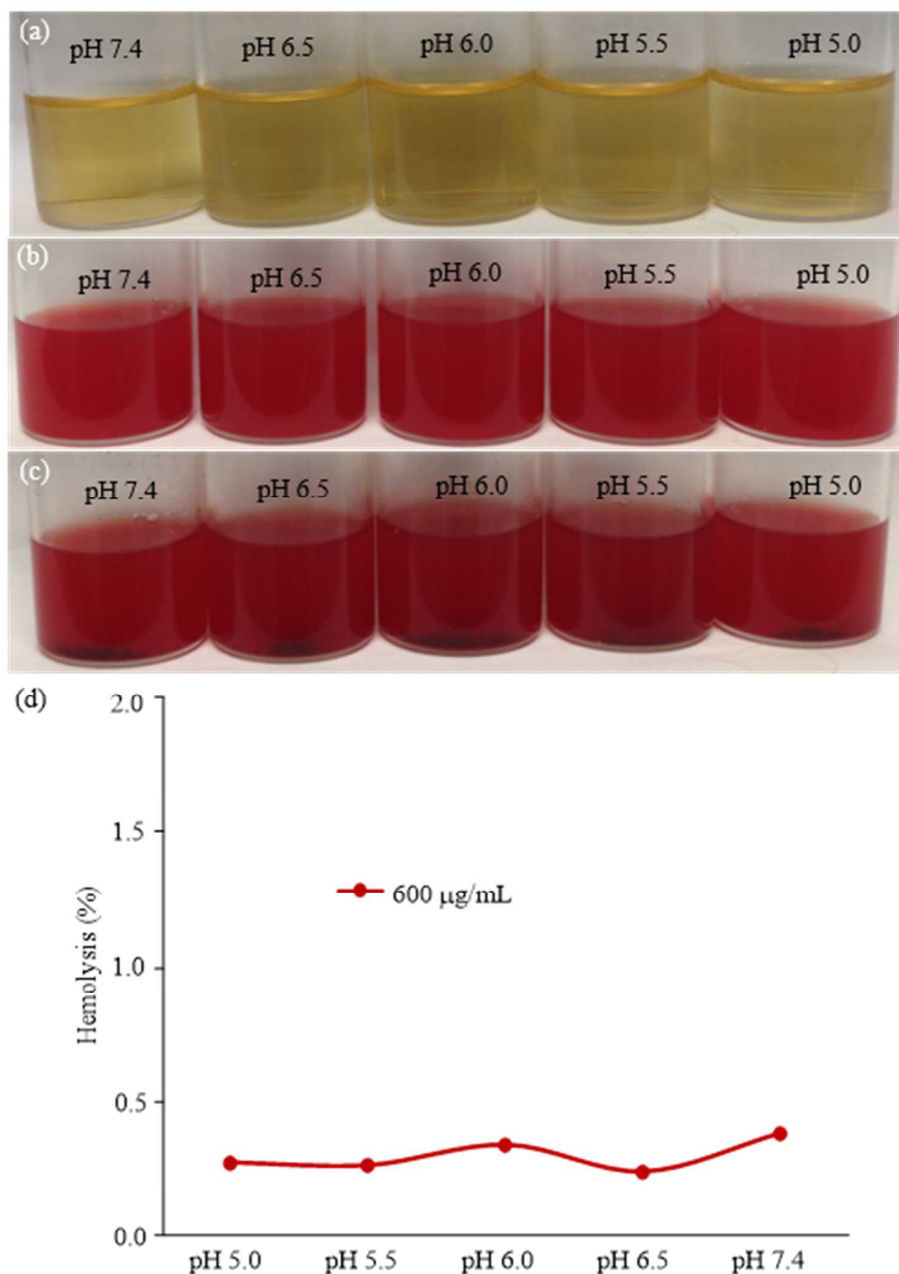

**Figure S8.** Photo images of the dispersity of Fe<sub>3</sub>O<sub>4</sub>-NICS-EGDE (a) dispersed in saline, (b) just after addition of RBCs, and (c) incubated at 37 °C for 5 h resulting into aggregation, and pH-dependent (d) hemolytic activities of unmodified Fe<sub>3</sub>O<sub>4</sub>-NICS-EGDE nanocomposite particles.

The aggregates of the unmodified Fe<sub>3</sub>O<sub>4</sub>-NICS-EGDE nanocomposite particles were observed as black precipitates (Figure S8c). The unmodified Fe<sub>3</sub>O<sub>4</sub>-NICS-EGDE nanocomposite particles showed low hemolytic activities (below 0.5%) because of their aggregation in the RBC dispersion resulted in negligible interaction with dispersed RBCs.



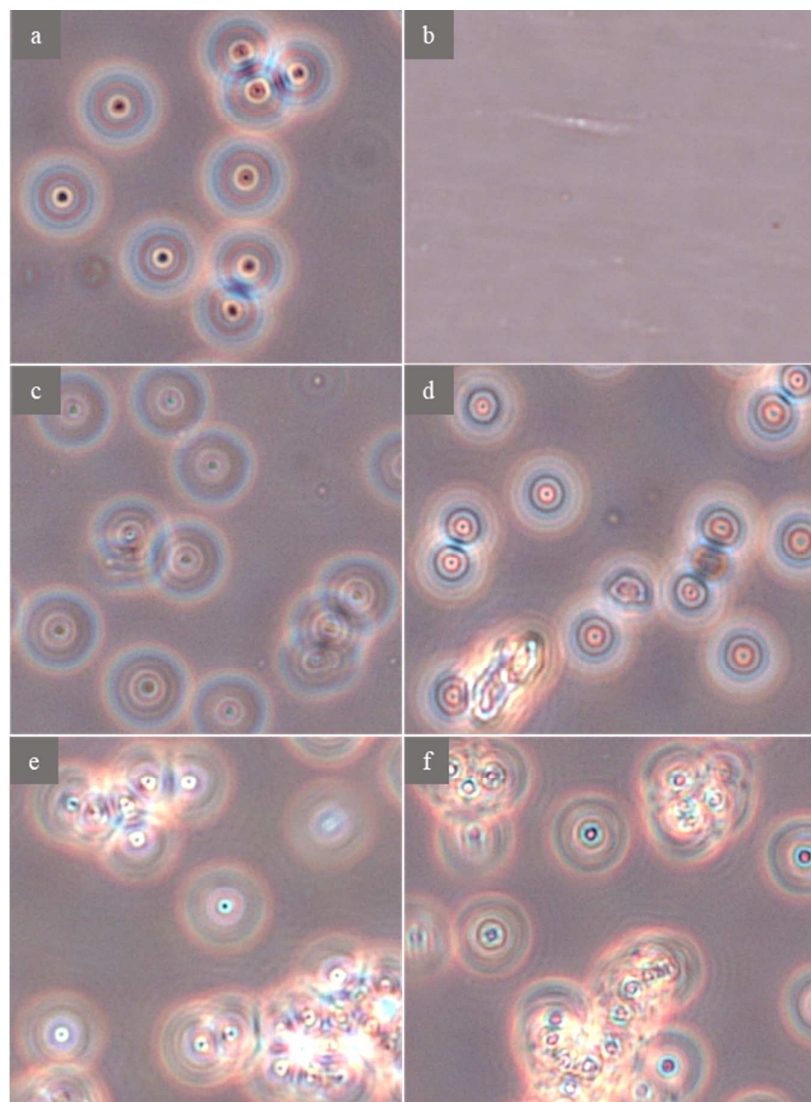

**Figure S9.** Light microscopic images of hemolysis of the sheep RBCs by charge-conversional  $\text{Fe}_3\text{O}_4$ -NICS-EGDE-EA nanocomposite particles: (a) negative control, (b) positive control (1% triton X100 aq.), incubated at pH 5.0 for (c) 0 h, (d) 1 h, (e) 3 h, and (f) 5 h with  $600 \mu\text{g mL}^{-1}$  nanocomposite.

Just after treatment with the dispersion of charge-conversional  $\text{Fe}_3\text{O}_4$ -NICS-EGDE-EA nanocomposite particles (0 h), RBCs showed their normal biconcave disk shape almost similar to the control cells (Figure S9<sub>a,c</sub>). A gradual membrane disruption was proceeded (Figure S9<sub>d-f</sub>) with the progression of time (1, 3, and 5 h) at the highest concentration ( $600 \mu\text{g mL}^{-1}$ ) under study. These observations support the pH-dependent hemolysis data and suggested that the charge-conversional  $\text{Fe}_3\text{O}_4$ -NICS-EGDE-EA nanocomposite particles have very negligible hemolytic activity at physiological conditions, while they are hemolytic at lower pH.

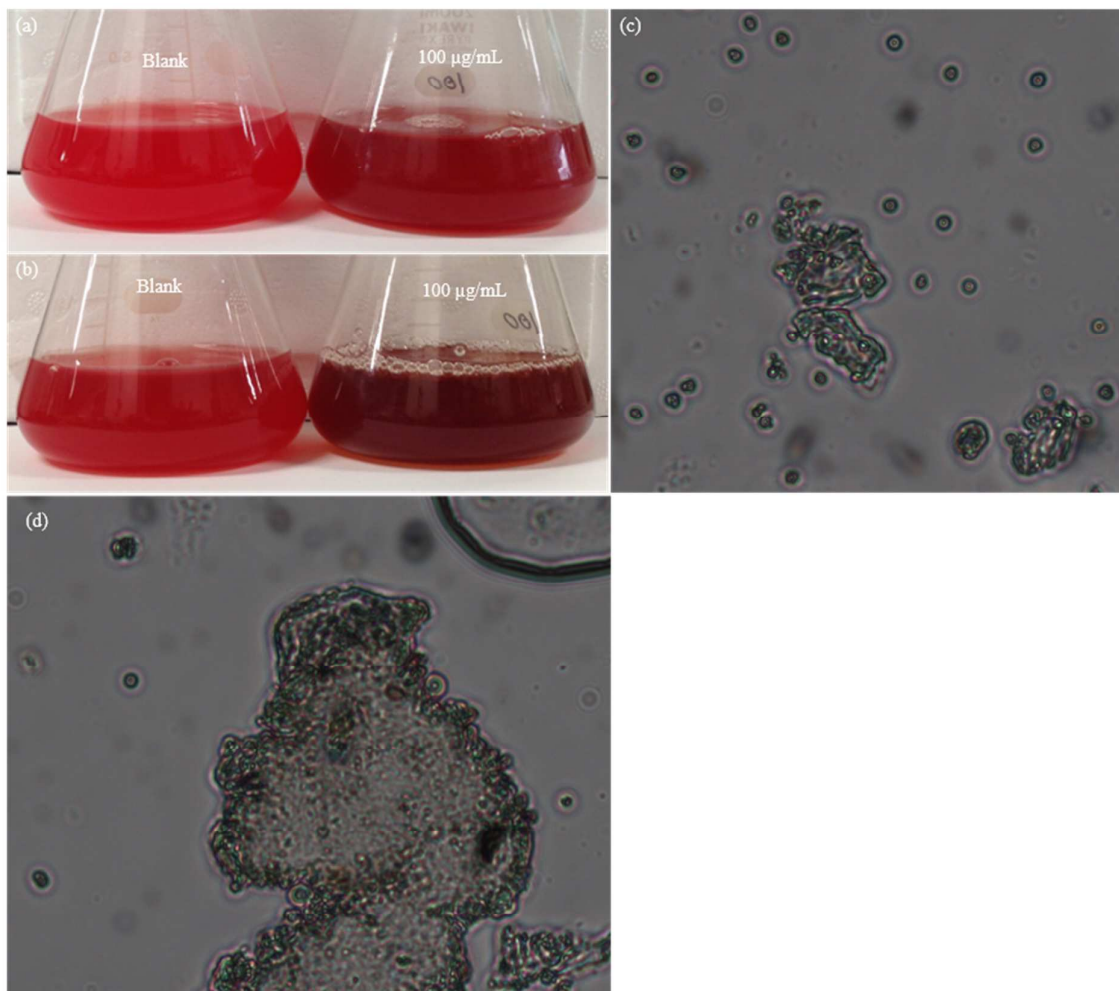

**Figure S10.** Membranalysis of sheep RBCs by the charge-conversional  $\text{Fe}_3\text{O}_4$ -NICS-EGDE-EA nanocomposite particles (a,b) optical images, and (c,d) light microscopic images after MW irradiation at pH 6.8 (zeta potential = -13 mV), and pH 6.5 (zeta potential = -7 mV), respectively.

## References:

1. Sashiwa, H.; Shigemasa, Y. Chemical Modification of Chitin and Chitosan 2: Preparation and Water Soluble Property of *N*-Acylylated or *N*-Alkylated Partially Deacetylated Chitins. *Carbohydr. Polym.* 1999, 39, 127-138.
2. Zhu, A.; Chen, T.; Yuan, L.; Wu, H.; Lu, P. Synthesis and Characterization of *N*-Succinyl-Chitosan and its Self-Assembly of Nanospheres. *Carbohydr. Polym.* 2006, 66, 274-279.
3. Wu, J.; Yang, J. Superlong Salicylideneaniline Semiconductor Nanobelts Prepared by a Magnetic Nanoparticle-Assisted Self-Assembly Process for Luminescence Thermochromism. *ACS Omega* 2017, 2, 2264-2272.
4. Dolatkah, A.; Wilson, L. D. Magnetite/Polymer Brush Nanocomposites with Switchable Uptake Behavior Toward Methylene Blue. *ACS Appl. Mater. Interface* 2016, 8, 5595-5607.
5. Rahman, M. A.; Ochiai, B. Fabrication and Hemocompatibility of Carboxy-Chitosan Stabilized Magnetite Nanoparticles. *Microsyst. Technol.* 2017, DOI:10.1007/s00542-017-3318-8.
